# Supplementary material for: The effect of the 7R allele at the DRD4 locus on risk tolerance is independent of background risk in Senegalese fishermen
Source: Springer Nature journal article supplement (doi:10.1038/s41598-022-27002-3), 2023-01-12
Supplement: MOESM1 [file 41598_2022_27002_MOESM1_ESM.pdf]

The effect of the 7R allele at the DRD4 locus on risk tolerance is  
independent of background risk in Senegalese fishermen

## Supplementary Materials

Gwen-Jiro Clochard

Aby Mbengue

Clément Mettling

Birane Diouf

Charlotte Faurie

Omar Sene

Emilie Chancerel

Erwan Guichoux

Guillaume Hollard

Michel Raymond

Marc Willinger

December 2022

# Supplementary Materials

## Differences in income between fishermen and non-fishermen

Table S.1: Differences in income for fishermen

|           | (1)<br>Income level |
|-----------|---------------------|
| Fisherman | 0.958***<br>(0.138) |
| Constant  | 2.211***<br>(0.109) |
| $R^2$     | 0.073               |
| No. obs   | 616                 |

The outcome variable is the declared income level. Standard errors between parentheses. Both risky and non-risky areas were combined. Student's  $t$ -test \*  $p < 0.10$ , \*\*  $p < 0.05$ , \*\*\*  $p < 0.01$ .

## Descriptive statistics

Table S.2: Descriptive statistics

| <b>Variable</b>                     | <b>Mean</b> | <b>Std. Dev.</b> | <b>Min.</b> | <b>Max.</b> | <b>N</b> |
|-------------------------------------|-------------|------------------|-------------|-------------|----------|
| <i>Panel A. Combined</i>            |             |                  |             |             |          |
| Age                                 | 28.978      | 12.462           | 18          | 92          | 860      |
| Education                           | 3.023       | 2.990            | 0           | 9           | 835      |
| Income                              | 2.808       | 1.718            | 1           | 6           | 616      |
| Fisherman                           | 0.609       | 0.488            | 0           | 1           | 864      |
| <i>Panel B. Risky area only</i>     |             |                  |             |             |          |
| Age                                 | 28.267      | 10.881           | 18          | 92          | 600      |
| Education                           | 2.404       | 2.717            | 0           | 9           | 581      |
| Income                              | 3.080       | 1.836            | 1           | 6           | 425      |
| Fisherman                           | 0.857       | 0.350            | 0           | 1           | 601      |
| <i>Panel C. Non-risky area only</i> |             |                  |             |             |          |
| Age                                 | 30.619      | 15.408           | 18          | 71          | 260      |
| Education                           | 4.437       | 3.107            | 0           | 9           | 254      |
| Income                              | 2.204       | 1.225            | 1           | 6           | 191      |
| Fisherman                           | 0.042       | 0.201            | 0           | 1           | 263      |

Descriptive characteristics of the sample, for the combined sample, and disaggregated by zone. Age is calculated in years, education in years of formal schooling. Income is a categorical variable with the declared weekly income (1: < XOF 15 000, 2: 16 000 to 35 000, 3: 36 000 to 45 000, 4: 46 000 to 55 000, 5: 56 000 to 75 000, 6: > 76 000).

## Differences in behavior between zones and genotypes

Table S.3: Differences between zones in risk-tolerance

|            | (1)                  | (2)                  |
|------------|----------------------|----------------------|
|            | Without controls     | With controls        |
| Risky area | -0.099***<br>(0.027) | -0.105***<br>(0.029) |
| Age        |                      | -0.002<br>(0.001)    |
| Education  |                      | 0.000<br>(0.005)     |
| Constant   | 0.544***<br>(0.022)  | 0.591***<br>(0.048)  |
| $R^2$      | 0.016                | 0.019                |
| No. obs    | 860                  | 833                  |

The outcome variable is risk-tolerance. A higher level of risk-tolerance indicates the choice of a riskier lottery by participants in the lottery choice task. Standard errors in parentheses. The coefficients are the results of Ordinary Least Square (OLS) estimations. Student's  $t$ -test \*  $p < 0.10$ , \*\*  $p < 0.05$ , \*\*\*  $p < 0.01$ .

Figure S.1: Distribution of risk-tolerance by genotype by zone

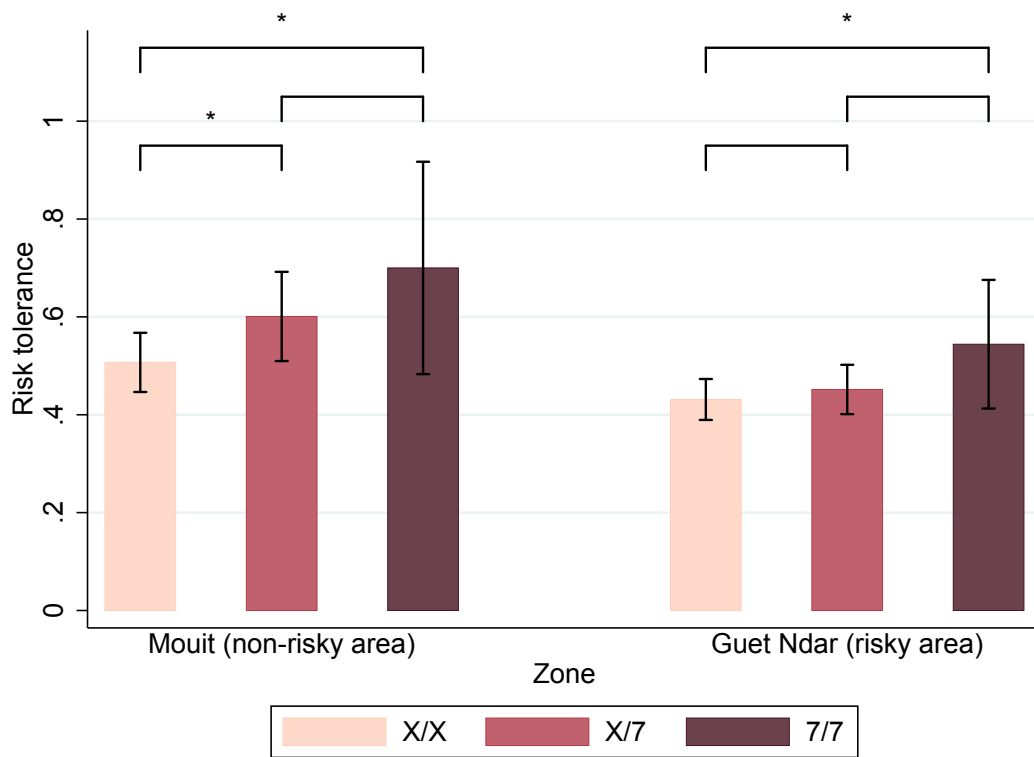

Note: The higher the risk-tolerance variable, the riskier the choice of participants. X/X, X/7 and 7/7 represent genotypes, with all alleles not 7R combined into the X allele. Segments represent 95% confidence intervals. \*  $p < 0.1$ , \*\*  $p < 0.05$ , \*\*\*  $p < 0.01$ .

Table S.4: Effects of control variables on risk-attitudes

|                | Combined sample<br>(1) | Non-risky area only<br>(2) | Risky area only<br>(3) |
|----------------|------------------------|----------------------------|------------------------|
| Age            | -0.002<br>(0.001)      | 0.002<br>(0.002)           | -0.003**<br>(0.001)    |
| Education      | 0.0002<br>(0.005)      | 0.013<br>(0.009)           | -0.004<br>(0.005)      |
| Risky area     | -0.105***<br>(0.029)   |                            |                        |
| Constant       | 0.591***<br>(0.048)    | 0.435***<br>(0.083)        | 0.543***<br>(0.044)    |
| Observations   | 833                    | 252                        | 581                    |
| R <sup>2</sup> | 0.019                  | 0.010                      | 0.010                  |

*Note:* The outcome variable is risk-tolerance. A higher level of risk-tolerance indicates the choice of a riskier lottery by participants in the lottery choice task. Standard errors in parentheses. The coefficients are the results of Ordinary Least Square (OLS) estimations. In column 1, the sample is pooled (non-risky and risky areas). In columns 2 and 3, the sample is restricted to individuals from the non-risky and risky areas, respectively. Student's *t*-test \*  $p < 0.10$ , \*\*  $p < 0.05$ , \*\*\*  $p < 0.01$ .

## Novelty seeking

**Task** We asked participants to choose one of two options. The first option was to drink one glass of a well-known and well recognizable soda. The second option was to drink two cups of a “novel” soda, which was prepared by the research team and was a mixture of a famous brand of soda and fruit juice. The variable *Novelty* is defined as a dummy variable equal to 1 if the participant chose the novel soda.

Table S.5: Differences between genotypes in novelty-seeking behavior

|                      | Combined sample<br>(1) |
|----------------------|------------------------|
| 7R: additive effect  | 0.048<br>(0.121)       |
| 7R: dominance effect | -0.007<br>(0.157)      |
| Age                  | 0.013***<br>(0.004)    |
| Education            | 0.036*<br>(0.021)      |
| Risky area           | -0.378***<br>(0.132)   |
| Constant             | -1.178***<br>(0.222)   |
| Observations         | 661                    |

*Note:* The outcome variable is novelty seeking. The variable for novelty seeking is a choice between two beverages, one being a standard easily recognizable, and the other being a new soda, unknown to participants. Standard errors in parentheses. The coefficients are the results of a Probit estimations. The sample is pooled (non-risky and risky areas). Student's *t*-test \*  $p < 0.10$ , \*\*  $p < 0.05$ , \*\*\*  $p < 0.01$ .

## Analysis of genetic differentiation between zones

Table S.6: Percentage of ancestors born in the same village as participants

|                           | (1)<br>Risky area | (2)<br>Non-risky area | (3)<br>Total |
|---------------------------|-------------------|-----------------------|--------------|
| Participants              | 81                | 67                    | 77           |
| <i>Total parents</i>      | 72                | 58                    | 68           |
| Mother                    | 71                | 67                    | 66           |
| Father                    | 73                | 49                    | 70           |
| <i>Total grandparents</i> | 68                | 50                    | 62           |
| Maternal grandfather      | 67                | 42                    | 59           |
| Maternal grandmother      | 69                | 51                    | 63           |
| Paternal grandfather      | 67                | 58                    | 64           |
| Paternal grandmother      | 68                | 49                    | 62           |

Figure S.2: Distribution of genotypic differentiation between the risky and non-risky areas

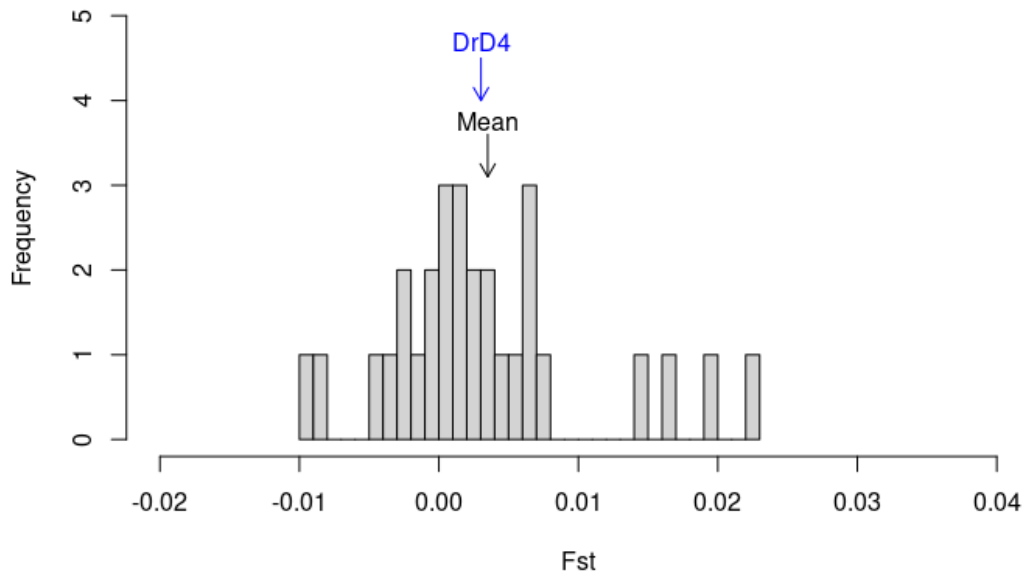

$F_{ST}$ -statistics for genotypic differentiation between the two areas, for the 29 microsatellite loci. The mean  $F_{ST}$  is indicated by an arrow, and the  $F_{ST}$  for DRD4 is indicated by another arrows.

## Micro-satellite analysis

**Microsatellite development** MicroSatellite DataBase (MSDB) v3 (Avvaru et al., 2020) was used to retrieve sequences containing SSR that are relatively well distributed across all chromosomes and located on intergenic regions. The motifs that have been retained were: AC and AG with a minimum of 9 repetitions; ACT, AGC and ATC with a minimum of 8 repetitions; ACTC, ACAG, ACTG, AGCT and ATGC with a minimum of 6 repetitions. The recovered sequences included the motif as well as the 200 bp upstream and downstream of this motif. A total of 5340 sequences were kept and analysed with QDD version 3.1.2. QDD primer design parameters were optimised for multiplex PCR as mentioned in Lepais et al. (2020): amplicon length between 100 and 180 bp, primer size between 21 and 26 bp, primer T<sub>m</sub> between 60 and 75 °C, T<sub>m</sub> difference between primers  $\leq 10$  °C and GC percent between 40 and 60. A total of 60 primer pairs were recovered and tagged at the 5-end with universal Illumina adapter overhang sequences: TCGTCGGCAGCGTCAGATGTGTATAAGAGACAG for forward primers and GTCTCGTGGGCTCGGAGATGTGTATAAGAGACAG for reverse primers, see Table S.8 for SSR localization on human chromosome and Table S.7 for primer list.

Amplification of all primers pairs was realised independently on a DNA pool of 10 individuals. The PCR was prepared in a final volume of 10  $\mu$ L containing 2  $\mu$ L of 5X Hot FIREpol Blend Master Mix (Solis Biodyne, Tartu, Estonia), 1  $\mu$ L of 2 $\mu$ M primer pairs, 1  $\mu$ L of the DNA pool (14 ng/ $\mu$ L) and 6  $\mu$ L of PCR-grade water. The PCR conditions consisted of an initial denaturation at 95°C for 15 min followed by 35 cycles of denaturation at 95°C for 20 s, annealing at 59°C for 60 s, extension at 72°C for 30 s, and a final extension step at 72°C for 10 min. The amplification of each primer pair was assessed on 3% agarose gel electrophoresis. Primer pairs that did not amplify or showed a non-specific profile were removed from further analyses.

**Genotyping analyses** Genotyping analyses included 95 DNA samples in replicates (including a negative control) to select loci that produced repeatable genotypes for the final genotypic data set.

PCR multiplexing of all selected markers was performed in a volume of 10 $\mu$ L using 2  $\mu$ L of 5X HOT FIREPol MultiPlex Mix (Solis Biodyne), 1  $\mu$ L of multiplex primer mix (0.5  $\mu$ M), 5  $\mu$ L of DNA (3 ng/ $\mu$ L) and 2  $\mu$ L of PCR-grade water. The PCR conditions consisted of an initial denaturation at 95°C for 12 min followed by 35 cycles of denaturation at 95°C for 30 sec, annealing at 59°C for 180 sec, extension at 72°C for 30 sec, and a final extension step at 72°C for 10 min. PCR products were checked by gel electrophoresis in 3% agarose.

The amplicons were amplified in a second step in order to attach Illumina adapters and dual indexes (8bp unique sequences) to each side of the amplicons.

This PCR was performed in a final volume of 20  $\mu\text{L}$  using 5X HOT FIREPol MultiPlex Mix, 5  $\mu\text{L}$  of amplicon and 0.5  $\mu\text{M}$  of each of the forward and reverse adapters. The PCR conditions consisted in an initial denaturation at 95°C for 12 min followed by 15 cycles of denaturation at 95°C for 30 s, annealing at 59°C for 90 s, extension at 72°C for 30 s, and a final extension step at 72°C for 10 min. The second PCR-barcoded amplicons were pooled in a single tube, purified with 1.8X Agencourt AMPure XP beads (Beckman Coulter, Brea, USA) and analysed on a on a TapeStation 4200 (Agilent, Santa Clara, USA). The final pool was quantified using QIAseq Library Quant Assay kit (Qiagen, Hilden, Germany) with a Roche LightCycler 480 quantitative PCR (Roche, Penzberg, Germany) and sequenced on an iSeq 100 system (Illumina, San Diego, USA) with a 2x150 bp kit.

The bioinformatic pipeline embedding FDSTools (Hoogenboom et al., 2017) and described in Lepais et al. (2020) was used to compare blind-repeated genotyping to estimate the genotyping error rate and to extract locus and allele information.

**Results** Of the 60 starting markers, only 54 gave a specific amplification of which 24 were discarded due to genotyping error of more than 5% or a high missing rate due to poor DNA recovery. Of the 30 remaining, 18 had a dinucleotide motif and 12 a trinucleotide motif and were distributed on 17 chromosomes in total (Table S.8). A total of 186 alleles differing in sequence (mean: 12 alleles per loci) and 159 alleles differing in size (mean 10.25 alleles per loci) were observed and one locus was identified as monomorphic.

Table S.7: Primer sequence for micro-satellites

| Locus       | Sequence                                                           |
|-------------|--------------------------------------------------------------------|
| SSRSEQ_002F | TCGTCGGCAGCGTCAGATGTGTATAAAGAGACAGGGGATGTTAATAGCACCTGTTTCACG       |
| SSRSEQ_005F | TCGTCGGCAGCGTCAGATGTGTATAAAGAGACAGATGCTCACACCATTGCACTCCAGCG        |
| SSRSEQ_007F | TCGTCGGCAGCGTCAGATGTGTATAAAGAGACAGGCTTCCAAGCTGGGAACGCAGTGTCT       |
| SSRSEQ_010F | TCGTCGGCAGCGTCAGATGTGTATAAAGAGACAGCCTTGAAGGTAGGGTGGCGAGCAT         |
| SSRSEQ_011F | TCGTCGGCAGCGTCAGATGTGTATAAAGAGACAGGGATGGCTTGGGCAATACTCTTGGT        |
| SSRSEQ_013F | TCGTCGGCAGCGTCAGATGTGTATAAAGAGACAGCCCAAAGCTGAATAAGTCTGTCCAC        |
| SSRSEQ_014F | TCGTCGGCAGCGTCAGATGTGTATAAAGAGACAGAACCAAAGTTGATTGCAGGTGGCTGC       |
| SSRSEQ_017F | TCGTCGGCAGCGTCAGATGTGTATAAAGAGACAGTTGTGGGTGTGCATGTGAGCAGGTG        |
| SSRSEQ_018F | TCGTCGGCAGCGTCAGATGTGTATAAAGAGACAGACCATTAGAAATAGCAGCCACTGT         |
| SSRSEQ_021F | TCGTCGGCAGCGTCAGATGTGTATAAAGAGACAGTACAGCAGGACAGTCTGGAGAGGAGG       |
| SSRSEQ_023F | TCGTCGGCAGCGTCAGATGTGTATAAAGAGACAGCCCGGTCTGTGGCTAGCTTTGATGG        |
| SSRSEQ_025F | TCGTCGGCAGCGTCAGATGTGTATAAAGAGACAGTTGCATGATCCAAAGAAGGTGGCCT        |
| SSRSEQ_027F | TCGTCGGCAGCGTCAGATGTGTATAAAGAGACAGCAAATGACTCCGCAGCTGTGGCAC         |
| SSRSEQ_028F | TCGTCGGCAGCGTCAGATGTGTATAAAGAGACAGTACCCGGAATCATGTGGGCATCAGA        |
| SSRSEQ_029F | TCGTCGGCAGCGTCAGATGTGTATAAAGAGACAGACAGGTGAGGAAACTGAGGCTGAAA        |
| SSRSEQ_033F | TCGTCGGCAGCGTCAGATGTGTATAAAGAGACAGGCCTATCCATCCAGCTACCAACCCT        |
| SSRSEQ_034F | TCGTCGGCAGCGTCAGATGTGTATAAAGAGACAGTGGTTTCCCTTCCCTAACCTCACT         |
| SSRSEQ_035F | TCGTCGGCAGCGTCAGATGTGTATAAAGAGACAGGCCTTTCTAGAGATGAAGACAGGGT        |
| SSRSEQ_039F | TCGTCGGCAGCGTCAGATGTGTATAAAGAGACAGTGGGAAAGTCCAGTTCCTGCTCCGT        |
| SSRSEQ_040F | TCGTCGGCAGCGTCAGATGTGTATAAAGAGACAGACAGTTCTGGAAGCTGCAAAGTCCA        |
| SSRSEQ_041F | TCGTCGGCAGCGTCAGATGTGTATAAAGAGACAGAGACCGAGTGGCCTTCAGCAAGTCA        |
| SSRSEQ_044F | TCGTCGGCAGCGTCAGATGTGTATAAAGAGACAGAGCAGGAACCTGTGCACCACATGGC        |
| SSRSEQ_047F | TCGTCGGCAGCGTCAGATGTGTATAAAGAGACAGTGGCTACCCATATTCTCAGCCCTGT        |
| SSRSEQ_048F | TCGTCGGCAGCGTCAGATGTGTATAAAGAGACAGGCAGGAGCCAGGTTACAGAGGGTTT        |
| SSRSEQ_049F | TCGTCGGCAGCGTCAGATGTGTATAAAGAGACAGTGGCACACCTACTAAGTCCCAGGCA        |
| SSRSEQ_057F | TCGTCGGCAGCGTCAGATGTGTATAAAGAGACAGTTGCCACCCTAGAGACAGGCTCAGC        |
| SSRSEQ_058F | TCGTCGGCAGCGTCAGATGTGTATAAAGAGACAGCCAGCTTGCTGACTGTAGATCTCGGG       |
| SSRSEQ_059F | TCGTCGGCAGCGTCAGATGTGTATAAAGAGACAGACATGAGAGCCGAGTATGTAAGTGA        |
| SSRSEQ_060F | TCGTCGGCAGCGTCAGATGTGTATAAAGAGACAGGGCAGGTCAGGAGGGTTCTGTCCTT        |
| SSRSEQ_002R | GTCTCGTGGGCTCGGAGATGTGTATAAAGAGACAGATGCCAGGAATTGTTCTAAGCATGT       |
| SSRSEQ_005R | GTCTCGTGGGCTCGGAGATGTGTATAAAGAGACAGAGGAGGCGAAGGGACCCTGGTAGAT       |
| SSRSEQ_007R | GTCTCGTGGGCTCGGAGATGTGTATAAAGAGACAGGGGATACAGGAGGACTTCAGAGTCA       |
| SSRSEQ_010R | GTCTCGTGGGCTCGGAGATGTGTATAAAGAGACAGCCATTTGCCATGGTCCCAGGAACCT       |
| SSRSEQ_011R | GTCTCGTGGGCTCGGAGATGTGTATAAAGAGACAGGCAGAGCAGAAAGGCGAAGTGGGCATAAGCG |
| SSRSEQ_013R | GTCTCGTGGGCTCGGAGATGTGTATAAAGAGACAGTGGTGTGCCACTCATGAGGGAGCT        |
| SSRSEQ_014R | GTCTCGTGGGCTCGGAGATGTGTATAAAGAGACAGGGCTGCAGTTGTTTACACCACAGCT       |
| SSRSEQ_017R | GTCTCGTGGGCTCGGAGATGTGTATAAAGAGACAGACTCCCTTCAACTCCAAGCGTGCCT       |
| SSRSEQ_018R | GTCTCGTGGGCTCGGAGATGTGTATAAAGAGACAGGTGAGGAATAGAAGCTGGACCCCTGT      |
| SSRSEQ_021R | GTCTCGTGGGCTCGGAGATGTGTATAAAGAGACAGCTGTGGGTTTGCAGCTGAGACGCA        |
| SSRSEQ_023R | GTCTCGTGGGCTCGGAGATGTGTATAAAGAGACAGGACACCAGAACACAAAGGGCACACC       |
| SSRSEQ_025R | GTCTCGTGGGCTCGGAGATGTGTATAAAGAGACAGTGGCTGGCATTAAATTATGTTCCAGA      |
| SSRSEQ_027R | GTCTCGTGGGCTCGGAGATGTGTATAAAGAGACAGCGTTTGGCACCAGGACTGTCCCAAC       |
| SSRSEQ_028R | GTCTCGTGGGCTCGGAGATGTGTATAAAGAGACAGACAGTCTCCTCCAGAAATGCGGATT       |
| SSRSEQ_029R | GTCTCGTGGGCTCGGAGATGTGTATAAAGAGACAGAAAGACCATCTTCTCCCTCTGCTTT       |
| SSRSEQ_033R | GTCTCGTGGGCTCGGAGATGTGTATAAAGAGACAGCACCAGTGCATGTTTACCCGAGGA        |
| SSRSEQ_034R | GTCTCGTGGGCTCGGAGATGTGTATAAAGAGACAGATGTTGTCACATAGGCGTGCAGGCA       |
| SSRSEQ_035R | GTCTCGTGGGCTCGGAGATGTGTATAAAGAGACAGGCACCTAGCAAGCACTTAACAAGCA       |
| SSRSEQ_039R | GTCTCGTGGGCTCGGAGATGTGTATAAAGAGACAGCCAGGGATGGCCTTGACCAACATA        |
| SSRSEQ_040R | GTCTCGTGGGCTCGGAGATGTGTATAAAGAGACAGAGGACTATGGCCTTATAAGAAGAGGA      |
| SSRSEQ_041R | GTCTCGTGGGCTCGGAGATGTGTATAAAGAGACAGTGTCACTGCCATCAACCCTTTCGTT       |
| SSRSEQ_044R | GTCTCGTGGGCTCGGAGATGTGTATAAAGAGACAGGCTTGGGCCATCTTCTTGTGTATAA       |
| SSRSEQ_047R | GTCTCGTGGGCTCGGAGATGTGTATAAAGAGACAGAAAGGTACAATAGGTGGTCCAGGTA       |
| SSRSEQ_048R | GTCTCGTGGGCTCGGAGATGTGTATAAAGAGACAGTCCACCATCCTCTTCCCTAGCTGGT       |
| SSRSEQ_049R | GTCTCGTGGGCTCGGAGATGTGTATAAAGAGACAGTAGGTGAAGTCTTAGCACATACGT        |
| SSRSEQ_057R | GTCTCGTGGGCTCGGAGATGTGTATAAAGAGACAGACCACTAGCAGGGTAGCTGGAGCAT       |
| SSRSEQ_058R | GTCTCGTGGGCTCGGAGATGTGTATAAAGAGACAGCGTGAAGTCAATGAGTCAATTTGAGGA     |
| SSRSEQ_059R | GTCTCGTGGGCTCGGAGATGTGTATAAAGAGACAGTGGTCCAGCTATCCACTACTTGG         |
| SSRSEQ_060R | GTCTCGTGGGCTCGGAGATGTGTATAAAGAGACAGCCAAGCTGGTGCCTTGAATACTGCA       |

Table S.8: Genetic differentiation between the non-risky and risky areas on micro-satellites.

| <b>Locus</b> | <b>Motif</b> | <b>Chromosome: position</b> | <b>N alleles<br/>Sequence</b> | <b>N allele<br/>Size</b> | <b>Allelic<br/>Error</b> | $F_{ST}$ |
|--------------|--------------|-----------------------------|-------------------------------|--------------------------|--------------------------|----------|
| SSRSEQ_002   | AC           | chr1:25140881-25140899      | 12                            | 8                        | 2.32%                    | 0.0053   |
| SSRSEQ_027   | AC           | chr2:9753457-9753484        | 7                             | 7                        | 0%                       | -0.0081  |
| SSRSEQ_028   | CAG          | chr2:16239536-16239584      | 17                            | 12                       | 0.76%                    | 0.0010   |
| SSRSEQ_029   | AGC          | chr2:44975447-44975477      | 9                             | 9                        | 3.12%                    | 0.0067   |
| SSRSEQ_039   | TG           | chr3:13815554-13815575      | 8                             | 8                        | 4.00%                    | 0.0069   |
| SSRSEQ_040   | AG           | chr3:28213984-28214005      | 3                             | 3                        | 0%                       | -0.0015  |
| SSRSEQ_041   | GAT          | chr4:1467533-1467565        | 5                             | 5                        | 0.60%                    | 0.0067   |
| SSRSEQ_044   | GA           | chr5:12484633-12484657      | 8                             | 8                        | 0.98%                    | -0.0001  |
| SSRSEQ_047   | CA           | chr6:12334400-12334425      | 6                             | 6                        | 0.64%                    | -0.0024  |
| SSRSEQ_048   | AGC          | chr6:21033972-21033999      | 7                             | 5                        | 1.68%                    | 0.0199   |
| SSRSEQ_049   | CAT          | chr6:34463481-34463513      | 4                             | 4                        | 0%                       | -0.0048  |
| SSRSEQ_057   | CAT          | chr8:37410868-37410898      | 7                             | 4                        | 0.62%                    | -0.0023  |
| SSRSEQ_058   | TG           | chr9:4357561-4357589        | 12                            | 11                       | 4.00%                    | 0.0033   |
| SSRSEQ_059   | AC           | chr9:10942052-10942074      | 3                             | 3                        | 0.76%                    | -0.0010  |
| SSRSEQ_060   | TC           | chr9:23340635-23340654      | 5                             | 4                        | 0%                       | 0.0017   |
| SSRSEQ_005   | GA           | chr10:7553026-7553045       | 6                             | 6                        | 0.78%                    | 0.0012   |
| SSRSEQ_007   | TC           | chr11:2009564-2009584       | 2                             | 2                        | 0%                       | 0.0007   |
| SSRSEQ_010   | GAT          | chr12:607351-607380         | 2                             | 2                        | 0%                       | 0.0041   |
| SSRSEQ_011   | TC           | chr12:41680046-41680064     | 3                             | 3                        | 0.72%                    | -0.0033  |
| SSRSEQ_013   | ATG          | chr13:24648458-24648485     | 7                             | 5                        | 2.87%                    | 0.0027   |
| SSRSEQ_014   | AGC          | chr13:67656823-67656870     | 11                            | 11                       | 0%                       | 0.0079   |
| SSRSEQ_017   | GT           | chr16:5398567-5398589       | 8                             | 5                        | 1.92%                    | 0.0226   |
| SSRSEQ_018   | AC           | chr16:12462593-12462611     | 4                             | 4                        | 0%                       | 0.0150   |
| SSRSEQ_021   | CTG          | chr17:49684195-49684223     | 3                             | 3                        | 0%                       | 0.0008   |
| SSRSEQ_023   | GT           | chr19:6517969-6517988       | 2                             | 2                        | 0%                       | 0.0165   |
| SSRSEQ_025   | GA           | chr19:28667178-28667198     | 4                             | 4                        | 0.73%                    | 0.0022   |
| SSRSEQ_033   | ATC          | chr20:56130369-56130397     | 3                             | 3                        | 0%                       | -0.0094  |
| SSRSEQ_034   | TG           | chr21:5520201-5520225       | 12                            | 6                        | 4.54%                    | 0.0040   |
| SSRSEQ_035   | CTA          | chr21:15100302-15100333     | 5                             | 5                        | 0%                       | 0.0001   |
| Combined     |              |                             |                               |                          |                          | 0.0035   |

The measure of differentiation  $F_{ST}$  refers to the estimate from Weir and Cockerham (1984).

## Measure of risk-tolerance

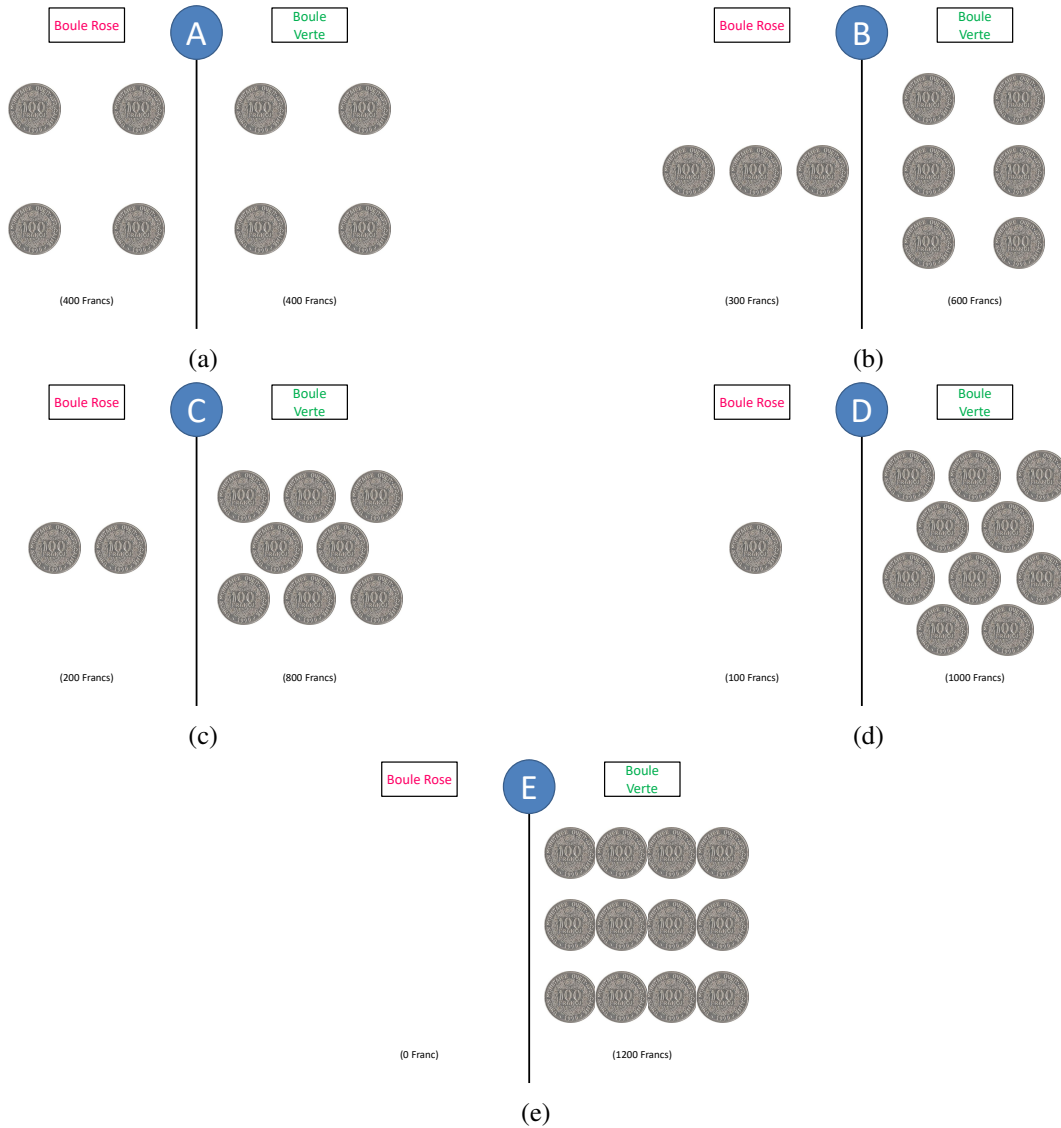

Figure S.3: Cards displayed in the risk-tolerance elicitation task.

Note: Participants were asked to choose a card among these five. The result is a variable *Choice* from 1 to 5. The variable *Risk-tolerance* was then computed using the following formula:  $Risk - tolerance = \frac{Choice - 1}{4}$ . The *Risk-tolerance* variable is therefore a variable ranging from 0 (the participant chose the safest option, i.e. the card A) to 1 (the participant chose the riskiest option, i.e. the card E).

Participants performed the task only once. Binswanger (1980) found no evidence that learning played a role when the task is repeated, therefore the single trial set up has become standard practice in experimental economics (see for instance Dave et al. (2010) or Holzmeister and Stefan (2021) for lab experiments, and Barr and Genicot (2008) or Strobl and Wunsch (2021) for field experiments).

## **Income as a confound**

**Method** One potential confound for our results could be that the effect of the 7R allele on risk-tolerance is confounded by an effect of income on risk-attitudes. To test for this, we performed the same regression as in our main specification, adding income as a control.

However, a large fraction of our sample (29%) answered “I do not know” when asked about their income, and their answers were therefor noted as missing values. To cope for this, we used two methods for imputation. First, a Lasso estimation using all other information available in the data set (other than genotype and risk-attitudes). Second, we used a random forest algorithm (Stekhoven and Buehlmann, 2012) using, again, existing other characteristics. Both methods enabled us to create a variable called “Predicted income”, equal to the value when reported, and equal to the imputed value when missing.

**Results** Results are presented in Table S.9. First, we can see that income is not correlated with risk-tolerance in any specification.

Second, when controlling for income in addition to age, education and living area, the effect of the 7R allele on risk-tolerance is no longer significant. However, the much smaller sample could be a reason to worry, which is the reason why we imputed the value of income for missing values.

Third and most importantly, when predicting the income for missing values using Machine Learning algorithms, we find similar results to the main specification, i.e. the 7R allele has an additive effect, no dominance effect, and there is no significant interaction effects between the living area and the effect of the 7R allele. The magnitude of the effects of the 7R allele is unaffected by the addition of income as a control.

Table S.9: Effect of income and the 7R allele on risk-attitudes, combined sample

|                                         | (1)<br>Effect of income | (2)<br>Effect of 7R with<br>income as control | (3)<br>Effect of 7R with<br>income imputed<br>from Lasso | (4)<br>Effect of 7R with<br>income imputed<br>from Random<br>Forest |
|-----------------------------------------|-------------------------|-----------------------------------------------|----------------------------------------------------------|---------------------------------------------------------------------|
| 7R: additive<br>effect                  |                         | 0.097*<br>(0.052)                             | 0.107**<br>(0.045)                                       | 0.109**<br>(0.042)                                                  |
| 7R: dominance<br>effect                 |                         | 0.016<br>(0.045)                              | -0.024<br>(0.037)                                        | -0.029<br>(0.036)                                                   |
| Age                                     | -0.001<br>(0.001)       | -0.002<br>(0.001)                             | -0.002**<br>(0.001)                                      | -0.002**<br>(0.001)                                                 |
| Education                               | 0.002<br>(0.005)        | -0.004<br>(0.006)                             | -0.004<br>(0.005)                                        | -0.004<br>(0.005)                                                   |
| Risky area                              | -0.134***<br>(0.035)    | -0.110**<br>(0.046)                           | -0.094**<br>(0.039)                                      | -0.088**<br>(0.038)                                                 |
| Income                                  | 0.005<br>(0.009)        | -0.001<br>(0.010)                             |                                                          |                                                                     |
| Predicted income<br><i>Lasso</i>        |                         |                                               | 0.001<br>(0.010)                                         |                                                                     |
| Predicted income<br><i>RandomForest</i> |                         |                                               |                                                          | -0.003<br>(0.009)                                                   |
| Risky area ×<br>7R: additive effect     |                         | -0.085<br>(0.058)                             | -0.062<br>(0.049)                                        | -0.058<br>(0.047)                                                   |
| Constant                                | 0.574***<br>(0.060)     | 0.597***<br>(0.068)                           | 0.595***<br>(0.058)                                      | 0.600***<br>(0.057)                                                 |
| Observations                            | 607                     | 501                                           | 699                                                      | 721                                                                 |
| R <sup>2</sup>                          | 0.029                   | 0.039                                         | 0.033                                                    | 0.034                                                               |

The outcome variable is risk-tolerance. A higher level of risk-tolerance indicates the choice of a riskier lottery by participants in the lottery choice task. Standard errors in parentheses. The coefficients are the results of Ordinary Least Square (OLS) estimations. The “Predicted income *Lasso*” variable is constructed using a Lasso estimation, using all other variables available (except risk attitudes and genotypes). The “Predicted income *Forest*” variable is constructed using a random forest algorithm (Stekhoven and Buehlmann, 2012). Student’s *t*-test \*  $p < 0.10$ , \*\*  $p < 0.05$ , \*\*\*  $p < 0.01$ .

## References

- Avvaru, A. K., D. Sharma, A. Verma, R. K. Mishra, and D. T. Sowpati (2020). Msdb: a comprehensive, annotated database of microsatellites. *Nucleic acids research* 48(D1), D155–D159.
- Barr, A. and G. Genicot (2008). Risk sharing, commitment, and information: an experimental analysis. *Journal of the European Economic Association* 6(6), 1151–1185.
- Binswanger, H. P. (1980). Attitudes toward risk: Experimental measurement in rural india. *American Journal of Agricultural Economics* 62(3), 395–407.
- Dave, C., C. C. Eckel, C. A. Johnson, and C. Rojas (2010). Eliciting risk preferences: When is simple better? *Journal of Risk and Uncertainty* 41(3), 219–243.
- Holzmeister, F. and M. Stefan (2021). The risk elicitation puzzle revisited: Across-methods (in) consistency? *Experimental Economics* 24(2), 593–616.
- Hoogenboom, J., K. J. van der Gaag, R. H. de Leeuw, T. Sijen, P. de Knijff, and J. F. Laros (2017). Fdstools: A software package for analysis of massively parallel sequencing data with the ability to recognise and correct str stutter and other pcr or sequencing noise. *Forensic Science International: Genetics* 27, 27–40.
- Lepais, O., E. Chancerel, C. Boury, F. Salin, A. Manicki, L. Taillebois, C. Dutech, A. Aissi, C. F. Bacles, F. Daverat, et al. (2020). Fast sequence-based microsatellite genotyping development workflow. *PeerJ* 8, e9085.
- Stekhoven, D. J. and P. Buehlmann (2012). Missforest - non-parametric missing value imputation for mixed-type data. *Bioinformatics* 28(1), 112–118.
- Strobl, R. and C. Wunsch (2021). Risky choices and solidarity: disentangling different behavioural channels. *Experimental Economics* 24(4), 1185–1214.
- Weir, B. S. and C. C. Cockerham (1984). Estimating f-statistics for the analysis of population structure. *evolution* 38(6), 1358–1370.

## Authors' affiliations

G-J Clochard: University of Chicago and UCEMAs Joint Initiative for Latin American Experimental Economics - Ecole polytechnique - CREST (CNRS-UMR 9194), Palaiseau, France

A. Mbengue: Université Gaston Berger, Saint-Louis, Sénégal

C. Mettling: ISEM Univ Montpellier, CNRS, IRD, Montpellier, France - IGH Univ Montpellier, CNRS, Montpellier, France

B. Diouf: Université Gaston Berger, Saint-Louis, Sénégal

C. Faurie: ISEM Univ Montpellier, CNRS, IRD, Montpellier, France

O. Sene: Université Alioune Diop, Bambey, Sénégal

E. Chancerel: Univ. Bordeaux, INRAE, BIOGECO, Plateforme Genome Transcriptome de Bordeaux, F-33610 Cestas, France

E. Guichoux: Univ. Bordeaux, INRAE, BIOGECO, Plateforme Genome Transcriptome de Bordeaux, F-33610 Cestas, France

G. Hollard: Ecole polytechnique - CREST (CNRS-UMR 9194), Palaiseau, France - CNRS

M. Raymond: ISEM Univ Montpellier, CNRS, IRD, Montpellier, France

M. Willinger: CEE-M Univ Montpellier, CNRS, INRAE, Institut Agro, Montpellier, France
